# Supplementary material for: Multilevel selection favors fragmentation modes that maintain cooperative interactions in multispecies communities
Source: PubMed Central journal article supplement (PMC8460008; doi:10.1371/journal.pcbi.1008896), 2021-09-13
Supplement: pcbi.1008896.s005.pdf [file pcbi.1008896.s005.pdf]

## 97 S5 Comparison with the results of Pichugin et al.

98 In Pichugin, Peña, Rainey, and Traulsen [1], cells within group  $i$  grow with a birth rate  $b(N_i) = 1 + Mg(N_i)$ ,  
 99 where  $g(N_i) = [(N_i - 1)/(N_{\max} - 2)]^\kappa$ . Here,  $N_{\max}$  is the maximum cell number in a group,  $M$  is the max-  
 100 imum benefit of group life, and  $\kappa$  is a “complementarity” parameter that measures how each additional  
 101 cell increases the benefit. When the number of cells reaches  $N_{\max}$ , the group fissions according to a given  
 102 fissioning strategy, or “partition”. Pichugin and collaborators [1] tested all mathematically possible parti-  
 103 tions for a given  $N_{\max}$ , and measured their group-level fitness. Among other results, they found that the  
 104 complementarity parameter  $\kappa$  is one of the main determinants of group-level fitness. Overall, if there are  
 105 diminishing returns to the benefit of additional cells ( $\kappa \ll 1$ ), binary fragmentation is the most fit parti-  
 106 tion, but if there are increasing returns ( $\kappa \gg 1$ ), unicellular propagule production is the most fit. Other  
 107 parameters, such as maximum benefit  $M$ , have a smaller influence on group-level fitness.

108 Our framework is compatible with this result from [1]. We set the group extinction rate to zero, and the  
 109 birth rate of a cell in group  $i$  to  $b_i(N_i) = 1 + g(N_i)$ , with  $g(N_i) = [(N_i - 1)/(K_{\text{ind}} - 2)]^\kappa$ . Finally, we set the group  
 110 fission rate to zero if  $N_i < K_{\text{ind}}$ , else  $B_i = B_0 = 10^6$ . When we measure group growth rate we observe the  
 111 same result as in [1] (Fig I, panel A). The same pattern is observed when measuring cell growth rate (Fig I,  
 112 panel B), which makes sense because, as soon as group size has equilibrated, both cells and groups have to  
 113 grow at the same rate.

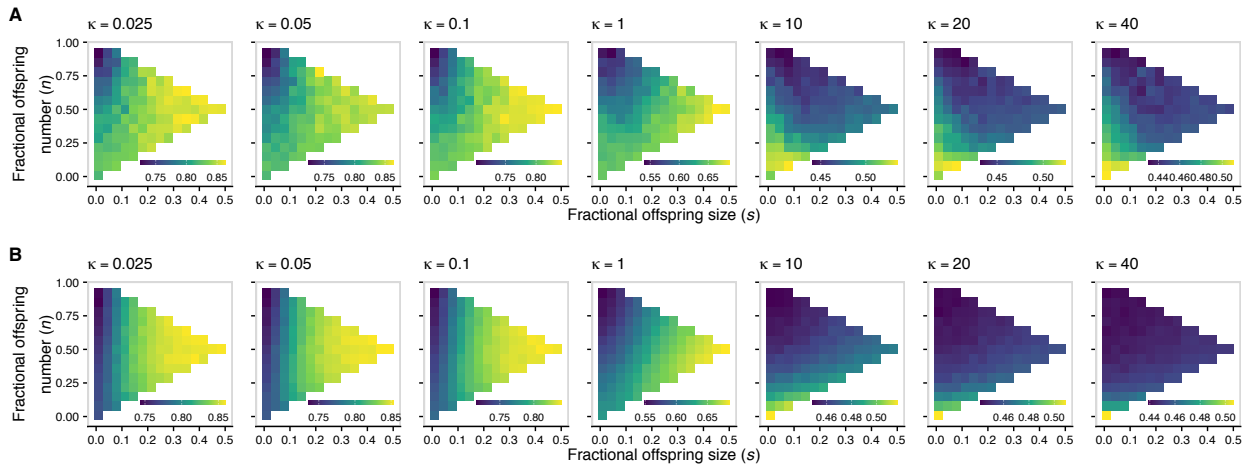

**Fig I:** In the absence of group-level density-dependence, if the cell birth rate increases with group size, the complementarity parameter  $\kappa$  determines which strategy maximizes fitness—measured either as group-level growth rate (**panel A**) or as cell-level growth rate (**panel B**). For  $\kappa \ll 1$  (diminishing returns), binary fragmentation maximizes fitness, whereas for  $\kappa \gg 1$  (increasing returns), single-cell reproduction maximizes fitness. The color scale indicates growth rate.

<sup>114</sup> **References**

- <sup>115</sup> 1. Pichugin Y, Peña J, Rainey PB, Traulsen A. Fragmentation modes and the evolution of life cycles. PLoS  
<sup>116</sup> Computational Biology. 2017;13(11):e1005860.
